# Supplementary material for: Determining the Balance Between Drug Efficacy and Safety by the Network and Biological System Profile of Its Therapeutic Target
Source: PubMed Central journal article supplement (PMC6220079; doi:10.3389/fphar.2018.01245), 2018-10-31
Supplement: Table_1.pdf [file Table_1.pdf]

**Supplementary Information for:**

**Determining the Balance between Drug Efficacy and Safety by the  
Network and Biological System Profile of Its Therapeutic Target**

Xiaoxu LI<sup>1,2</sup>, Jiayi YIN<sup>1</sup>, Jing TANG<sup>1,2</sup>, Yinghong LI<sup>1,2</sup>, Qingxia YANG<sup>1,2</sup>, Ziyu XIAO<sup>1</sup>, Runyuan  
ZHANG<sup>1</sup>, Yunxia WANG<sup>1</sup>, Jiajun HONG<sup>1</sup>, Lin TAO<sup>3</sup>, Weiwei XUE<sup>2</sup>, Feng ZHU<sup>1,2,\*</sup>

<sup>1</sup> College of Pharmaceutical Sciences, Zhejiang University, Hangzhou 310058, China

<sup>2</sup> School of Pharmaceutical Sciences and Collaborative Innovation Center for Brain Science, Chongqing  
University, Chongqing 401331, China

<sup>3</sup> Key Laboratory of Elemene Class Anti-cancer Chinese Medicine of Zhejiang Province, School of Medicine,  
Hangzhou Normal University, Hangzhou, P. R. China 310036

\*Correspondence should be sent to Prof. Feng Zhu ([zhufeng@zju.edu.cn](mailto:zhufeng@zju.edu.cn); [prof.zhufeng@gmail.com](mailto:prof.zhufeng@gmail.com))

**Table S1.** 161 NTI (Y) and 29 NNTI (N) drugs approved by FDA together with their disease indications and corresponding targets.

| <b>FDA Approved Drug</b> | <b>Time of Approval</b> | <b>FDA Approved Representative Indication(s)</b>   | <b>Target Name</b>               | <b>TI Information and Reference(s)</b> |
|--------------------------|-------------------------|----------------------------------------------------|----------------------------------|----------------------------------------|
| Apixaban                 | 2012                    | Stroke and systemic embolism; Deep vein thrombosis | Coagulation factor X             | N <sup>1,2</sup>                       |
| Aripiprazole             | 2002                    | Schizophrenia                                      | Dopamine D2 receptor             | N <sup>3</sup>                         |
| Atomoxetine HCl          | 2002                    | Attention-deficit hyperactivity disorder           | Norepinephrine transporter       | N <sup>4</sup>                         |
| Clobazam                 | 2011                    | Seizures associated with lennox–gastaut syndrome   | GABA(A) receptor                 | N <sup>1,5</sup>                       |
| Clonazepam               | 1975                    | Seizure disorders; Panic disorder                  | GABA(A) receptor                 | N <sup>1</sup>                         |
| Enalapril Maleate        | 1985                    | Hypertension                                       | Angiotensin-converting enzyme    | N <sup>6</sup>                         |
| Ethosuximide             | 1960                    | Epilepsy                                           | VG calcium channel alpha-1G      | N <sup>1</sup>                         |
| Ezogabine                | 2011                    | Partial-onset seizures                             | KQT-like 2/3                     | N <sup>1,5</sup>                       |
| Felbamate                | 1993                    | Epilepsy                                           | GABA(A)/NMDA receptor            | N <sup>1</sup>                         |
| Gabapentin               | 1993                    | Postherpetic neuralgia; Partial onset seizures     | VG calcium channel A2D2/A2D3     | N <sup>7</sup>                         |
| Lacosamide               | 2008                    | Partial-onset seizures in epilepsy                 | Dystrophin-related protein 2     | N <sup>1,8</sup>                       |
| Lamivudine               | 1995                    | Acquired immune deficiency syndrome                | HIV reverse transcriptase        | N <sup>9</sup>                         |
| Lamotrigine              | 1994                    | Bipolar disorder; Epilepsy                         | Voltage-gated sodium channel     | N <sup>1</sup>                         |
| Levetiracetam            | 1999                    | Partial onset seizures in adults with epilepsy     | Synaptic vesicle glycoprotein 2A | N <sup>1</sup>                         |
| Linagliptin              | 2011                    | Type 2 diabetes                                    | Dipeptidyl peptidase IV          | N <sup>10</sup>                        |
| Mechlorethamine HCl      | 1949                    | T-cell lymphoma                                    | Human DNA                        | N <sup>11</sup>                        |
| Mitoxantrone HCl         | 1987                    | Multiple sclerosis                                 | DNA topoisomerase II             | N <sup>12</sup>                        |
| Montelukast Sodium       | 1998                    | Asthma; Seasonal allergic rhinitis                 | Leukotriene CysLT1 receptor      | N <sup>13</sup>                        |

|                     |      |                                                         |                                   |                   |
|---------------------|------|---------------------------------------------------------|-----------------------------------|-------------------|
| Oxcarbazepine       | 2000 | Epileptic seizures                                      | Voltage-gated sodium channel      | N <sup>1</sup>    |
| Perampanel          | 2012 | Partial-onset seizures in patients with epilepsy        | AMPA receptor                     | N <sup>1,2</sup>  |
| Pimecrolimus        | 2001 | Mild to moderate atopic dermatitis                      | Calcineurin                       | N <sup>14</sup>   |
| Pregabalin          | 2004 | Neuralgia; Partial onset seizures; Fibromyalgia         | VG calcium channel alpha-2        | N <sup>1,15</sup> |
| Rivaroxaban         | 2011 | Stroke and systemic embolism; Deep vein thrombosis      | Coagulation factor X              | N <sup>1,5</sup>  |
| Rolapitant HCl      | 2015 | Nausea and vomiting associated with chemotherapy        | Neurokinin-1 receptor             | N <sup>16</sup>   |
| Rufinamide          | 2008 | Seizures associated with lennox–Gastaut syndrome        | Target Not Clear                  | N <sup>1,8</sup>  |
| Topiramate          | 1996 | Partial onset seizures                                  | GABA(A) receptor                  | N <sup>1</sup>    |
| Vigabatrin          | 2009 | InfAntile spasms and complex partial seizures in adults | GABA transaminase                 | N <sup>1,17</sup> |
| Zonisamide          | 2000 | Partial seizures in adults with epilepsy                | VG sodium channel 1 subunit alpha | N <sup>1</sup>    |
| Amikacin            | 1981 | Bacterial infections                                    | Bacterial 30S ribosome            | Y <sup>18</sup>   |
| Amiodarone HCl      | 1985 | Recurrent ventricular arrhythmias                       | Target Not Clear                  | Y <sup>19</sup>   |
| Amitriptyline HCl   | 1961 | Major depressive disorder                               | Serotonin transporter             | Y <sup>20</sup>   |
| Amlodipine Besylate | 1992 | Hypertension; Coronary artery disease                   | Target Not Clear                  | Y <sup>21</sup>   |
| Amphotericin B      | 1964 | Fungal infections                                       | Fungal ergosterol                 | Y <sup>22</sup>   |
| Argatroban          | 2000 | Thrombosis                                              | Coagulation factor II             | Y <sup>1</sup>    |
| Axitinib            | 2012 | Advanced renal cell carcinoma                           | VEGF-2 receptor                   | Y <sup>23</sup>   |
| Azathioprine        | 1968 | Rheumatoid arthritis                                    | Amidophosphoribosyl transferase   | Y <sup>24</sup>   |
| Baclofen            | 1977 | Multiple sclerosis                                      | GABA(B) receptor                  | Y <sup>25</sup>   |
| Busulfan            | 1954 | Chronic myelogenous leukemia                            | Human DNA                         | Y <sup>26</sup>   |

|                   |      |                                                             |                                        |                      |
|-------------------|------|-------------------------------------------------------------|----------------------------------------|----------------------|
| Capecitabine      | 1998 | Breast cancer                                               | Thymidylate synthase                   | Y <sup>27</sup>      |
| Carbamazepine     | 1968 | Epilepsy; Trigeminal neuralgia                              | Sodium channel SCN5A                   | Y <sup>1,28,29</sup> |
| Carboplatin       | 1989 | Ovarian cancer                                              | Human DNA                              | Y <sup>30</sup>      |
| Chloroquine       | 1949 | Malaria; Rheumatoid Arthritis                               | Plasmodium lactate dehydrogenase       | Y <sup>31</sup>      |
| Cidofovir         | 1996 | Cytomegalovirus                                             | Viral DNA polymerase                   | Y <sup>32</sup>      |
| Cisapride         | 1993 | Gastroesophageal reflux disease                             | 5-HT 4 receptor                        | Y <sup>33</sup>      |
| Cisplatin         | 1978 | Metastatic testicular, bladder and ovarian tumors           | Human DNA                              | Y <sup>34</sup>      |
| Clindamycin       | 1970 | Susceptible anaerobic bacteria infections                   | Bacterial 50S ribosome subunit         | Y <sup>1,35</sup>    |
| Clonidine         | 1974 | Hypertension                                                | Alpha-2 adrenergic receptor            | Y <sup>1,35,36</sup> |
| Clozapine         | 1989 | Resistant schizophrenia                                     | 5-HT 2a receptor                       | Y <sup>37</sup>      |
| Codeine           | 2009 | Mild to moderately severe pain                              | Opioid receptors                       | Y <sup>38</sup>      |
| Colchicine        | 2009 | Gout flares; Familial mediterranean fever                   | Tubulin                                | Y <sup>39,40</sup>   |
| Colistin          | 1962 | Gram-negative bacilli infections                            | Bacterial cell membrane                | Y <sup>41</sup>      |
| Cyclophosphamide  | 1959 | Malignant diseases; Minimal change nephrotic syndrome       | Human DNA                              | Y <sup>42</sup>      |
| Cyclosporine      | 1983 | Chronic rejection                                           | Calcineurin                            | Y <sup>1,43</sup>    |
| Dalteparin Sodium | 1994 | Prophylaxis of deep vein thrombosis                         | Coagulation factor X                   | Y <sup>44</sup>      |
| Digitoxin         | 1982 | Heart failure                                               | Na <sup>+</sup> /K <sup>+</sup> ATPase | Y <sup>1,45</sup>    |
| Digoxin           | 1954 | Mild to moderate heart failure; Chronic atrial fibrillation | Na <sup>+</sup> /K <sup>+</sup> ATPase | Y <sup>1,46</sup>    |
| Disopyramide      | 1977 | Ventricular arrhythmias                                     | Sodium channel SCN5A                   | Y <sup>47</sup>      |
| Docetaxel         | 1996 | Breast cancer; NSCLC; HRPC                                  | Tubulin beta-3 chain                   | Y <sup>48</sup>      |

|                     |      |                                                      |                                  |                   |
|---------------------|------|------------------------------------------------------|----------------------------------|-------------------|
| Doxorubicin HCl     | 1974 | Oncology                                             | DNA topoisomerase II             | Y <sup>49</sup>   |
| Efavirenz           | 1998 | HIV Infection                                        | HIV reverse transcriptase        | Y <sup>50</sup>   |
| Epinephrine         | 1951 | Anaphylaxis; Cardiac arrest                          | Alpha-2 adrenergic receptor      | Y <sup>51</sup>   |
| Epirubicin HCl      | 1999 | Axillary node tumor                                  | DNA topoisomerase II             | Y <sup>52</sup>   |
| Ethinyl Estradiol   | 1943 | Contraception; Menopausal hormone therapy            | Estrogen receptor                | Y <sup>1</sup>    |
| Etoposide           | 1983 | Refractory testicular tumors; Small cell lung cancer | DNA topoisomerase II             | Y <sup>53</sup>   |
| Everolimus          | 2009 | Renal cell carcinoma                                 | mTOR                             | Y <sup>1,54</sup> |
| Fentanyl            | 1968 | Analgesia                                            | Opioid receptor mu               | Y <sup>38</sup>   |
| Flecainide Acetate  | 1985 | Arrhythmic                                           | Sodium channel SCN5A             | Y <sup>55</sup>   |
| Fluorouracil        | 1962 | Colon and rectum, breast, Gastric, Pancreatic tumor  | Thymidylate synthase             | Y <sup>56</sup>   |
| Fondaparinux Sodium | 2001 | Deep vein thrombosis prophylaxis                     | Coagulation factor X             | Y <sup>57</sup>   |
| Fosphenytoin Sodium | 1996 | Epilepsy; convulsions                                | Sodium channel SCN5A             | Y <sup>58</sup>   |
| Gefitinib           | 2003 | Non-small-cell lung cancer                           | Epidermal growth factor receptor | Y <sup>59</sup>   |
| Gemcitabine HCl     | 1996 | Pancreatic Cancer                                    | Ribonucleotide reductase         | Y <sup>60</sup>   |
| Gentamicin          | 1970 | Antibacterial                                        | Bacterial 30S ribosome subunit   | Y <sup>18</sup>   |
| Guanethidine        | 1960 | Hypertensive emergency.                              | Norepinephrine transporter       | Y <sup>1,35</sup> |
| Heparin Sodium      | 1939 | Anticoagulant                                        | Antithrombin III                 | Y <sup>61</sup>   |
| Hydrocodone         | 2013 | Moderate to severe pain; Cough                       | Opioid receptor mu               | Y <sup>38</sup>   |
| Hydroxyurea         | 1967 | Sickle-cell anemia                                   | Ribonucleotide reductase         | Y <sup>62</sup>   |
| Imipramine HCl      | 1959 | Major depressive disorder; Childhood enuresis        | Target Not Clear                 | Y <sup>63</sup>   |

|                    |      |                                                      |                                  |                   |
|--------------------|------|------------------------------------------------------|----------------------------------|-------------------|
| Indinavir Sulfate  | 1996 | HIV Infection                                        | HIV protease                     | Y <sup>20</sup>   |
| Insulin            | 2000 | Diabetes mellitus                                    | Insulin                          | Y <sup>64</sup>   |
| Interferon Alfa-2b | 1986 | Malignant melanoma                                   | Interferon-alpha/beta receptor 2 | Y <sup>65</sup>   |
| Interferon Alfa-n3 | 1989 | Genital warts                                        | Interferon-alpha/beta receptor 2 | Y <sup>65</sup>   |
| Irinotecan HCl     | 1996 | Metastatic carcinoma of the colon or rectum          | DNA topoisomerase I              | Y <sup>49</sup>   |
| Ivermectin         | 1996 | Nondisseminated intestinal threadworm                | Parasitic Glu-chloride channel   | Y <sup>66</sup>   |
| Kanamycin          | 1973 | Antibacterial                                        | Bacterial 30S ribosome subunit   | Y <sup>67</sup>   |
| Levamisole HCl     | 1990 | Parasitic worm infections                            | Parasitic worm nicotinic AChR    | Y <sup>68</sup>   |
| Levothyroxine      | 2000 | Thyroid disease, Hypothyroidism                      | Thyroid hormone receptor beta    | Y <sup>1,46</sup> |
| Lidocaine          | 1948 | Local anesthetic; Ventricular arrhythmias; Epilepsy  | Voltage-gated sodium channel     | Y <sup>69</sup>   |
| Lindane            | 1974 | Infestations of lice and scabies                     | GABA(A) receptor                 | Y <sup>70</sup>   |
| Linezolid          | 2000 | Pneumonia; Skin and skin structure infections        | Bacterial 50S ribosome subunit   | Y <sup>71</sup>   |
| Lithium Carbonate  | 1970 | Bipolar disorder                                     | Target Not Clear                 | Y <sup>72</sup>   |
| Lithium Citrate    | 1980 | Manic episodes; bipolar disorder                     | Glycogen synthase kinase-3       | Y <sup>73</sup>   |
| Loperamide HCl     | 1976 | Diarrhea                                             | Opioid receptor mu               | Y <sup>66</sup>   |
| Mercaptopurine     | 1953 | Lymphatic leukemia; Acute myelogenous leukemia       | IMP dehydrogenase                | Y <sup>74</sup>   |
| Methadone          | 1947 | Dry cough; Opioid type drug dependence               | Opioid receptor mu               | Y <sup>38</sup>   |
| Methotrexate       | 1953 | Neoplastic diseases; Psoriasis; Rheumatoid arthritis | Dihydrofolate reductase          | Y <sup>30</sup>   |
| Midazolam HCl      | 1985 | Anesthesia                                           | Translocator protein             | Y <sup>75</sup>   |
| Mirtazapine        | 1996 | Depression                                           | 5-HT 2c receptor                 | Y <sup>76</sup>   |

|                   |      |                                                    |                                |                   |
|-------------------|------|----------------------------------------------------|--------------------------------|-------------------|
| Mitomycin         | 1981 | anticancer                                         | Human DNA                      | Y <sup>77</sup>   |
| Mitotane          | 1970 | Inoperable, adrenal cortical carcinoma             | Estrogen receptor              | Y <sup>78</sup>   |
| Morphine          | 1984 | Severe pain                                        | Opioid receptor mu             | Y <sup>38</sup>   |
| Mycophenolic Acid | 1995 | Organ rejection inpatients after heart transplants | IMP dehydrogenase              | Y <sup>79</sup>   |
| Neomycin          | 1964 | Bacterial infections                               | Bacterial 30S ribosome subunit | Y <sup>18</sup>   |
| Nortriptyline HCl | 1964 | Major depressive disorder                          | Target Not Clear               | Y <sup>4</sup>    |
| Olanzapine        | 1996 | Psychotic disorders                                | Dopamine D2 receptor           | Y <sup>80</sup>   |
| Orphenadrine HCl  | 1957 | Parkinson's disease                                | NMDA receptor                  | Y <sup>81</sup>   |
| Oxaliplatin       | 2002 | Colon or rectum carcinomas                         | Human DNA                      | Y <sup>82</sup>   |
| Oxymorphone       | 1959 | Severe pain; Preoperative medication               | Opioid receptor mu             | Y <sup>38</sup>   |
| Oxytocin          | 1980 | Induction of labor                                 | Oxytocin receptor              | Y <sup>83</sup>   |
| Paclitaxel        | 1992 | Kaposi's sarcoma                                   | Tubulin beta                   | Y <sup>84</sup>   |
| Pazopanib HCl     | 2009 | Renal cell carcinoma                               | VEGF-2 receptor                | Y <sup>23</sup>   |
| Pemetrexed        | 2004 | Malignant pleural mesothelioma                     | Dihydrofolate reductase        | Y <sup>85</sup>   |
| Pentobarbital     | 1973 | Insomnia                                           | GABA(A) receptor               | Y <sup>86</sup>   |
| Phenprocoumon     | 1957 | Thrombosis                                         | Vitamin K epoxide reductase    | Y <sup>87</sup>   |
| Phenytoin         | 1953 | Seizures                                           | Voltage-gated sodium channel   | Y <sup>1,58</sup> |
| Pimozide          | 1984 | Tourette's Disorder                                | Dopamine D2 receptor           | Y <sup>88</sup>   |
| Polymyxin B       | 1964 | Bacterial infections                               | Target Not Clear               | Y <sup>41</sup>   |
| Prazosin HCl      | 1976 | Hypertension                                       | Alpha 1A adrenoceptor          | Y <sup>1,35</sup> |

|                    |      |                                                         |                                  |                   |
|--------------------|------|---------------------------------------------------------|----------------------------------|-------------------|
| Primidone          | 1954 | Epilepsy                                                | Voltage-gated sodium channel     | Y <sup>1,35</sup> |
| Procainamide HCl   | 1950 | Ventricular arrhythmias                                 | BTX-activated cardiac channels   | Y <sup>89</sup>   |
| Propafenone HCl    | 1989 | Episodic atrial fibrillation; Ventricular arrhythmias   | Beta adrenoceptor                | Y <sup>1</sup>    |
| Propofol           | 1989 | Sedation; Anesthesia                                    | GABA(A) receptor                 | Y <sup>90</sup>   |
| Pyrazinamide       | 1971 | Tuberculosis                                            | Mycobacterium tuberculosis InhA  | Y <sup>91</sup>   |
| Quinidine          | 1950 | Ventricular arrhythmias                                 | Sodium channel SCN5A             | Y <sup>1</sup>    |
| Quinine            | 2005 | Uncomplicated plasmodium falciparum malaria             | Target Not Clear                 | Y <sup>92</sup>   |
| Regorafenib        | 2012 | Hepatocellular and Colorectal cancer                    | c-Kit; KDR                       | Y <sup>23</sup>   |
| Ribavirin          | 1985 | Hepatitis C                                             | IMP dehydrogenase                | Y <sup>93</sup>   |
| Secobarbital       | 1950 | Intractable insomnia                                    | GABA(A) receptor                 | Y <sup>86</sup>   |
| Sirolimus          | 1999 | Organ rejection in patients receiving renal transplants | mTOR                             | Y <sup>1,94</sup> |
| Sorafenib Tosylate | 2005 | Hepatocellular carcinoma; Renal cell carcinoma          | c-RAF; B-Raf; c-Kit; PDGFRB; KDR | Y <sup>23</sup>   |
| Sotalol HCl        | 1992 | Ventricular arrhythmias                                 | Beta-adrenergic receptor         | Y <sup>1</sup>    |
| Streptomycin       | 1946 | Bacterial infections                                    | Bacterial 30S ribosome subunit   | Y <sup>18</sup>   |
| Sunitinib Malate   | 2006 | Gastrointestinal stromal tumor; renal cell carcinoma    | c-Kit; PDGFRB; KDR               | Y <sup>23</sup>   |
| Tacrolimus         | 1994 | Prophylaxis of organ rejection                          | Calcineurin                      | Y <sup>1,95</sup> |
| Teniposide         | 1992 | Acute lymphocytic leukemia                              | DNA topoisomerase II             | Y <sup>30</sup>   |
| Theophylline       | 1970 | Chronic obstructive pulmonary disease; Asthma           | Phosphodiesterase 4              | Y <sup>1,96</sup> |
| Thioguanine        | 1966 | Acute nonlymphocytic leukemia                           | Human DNA                        | Y <sup>74</sup>   |
| Thioridazine HCl   | 1962 | Schizophrenic                                           | Dopamine D2 receptor             | Y <sup>55</sup>   |

|                      |      |                                                     |                                |                   |
|----------------------|------|-----------------------------------------------------|--------------------------------|-------------------|
| Tizanidine HCl       | 1996 | Muscle spasticity                                   | Alpha-2 adrenergic receptor    | Y <sup>97</sup>   |
| Tobramycin Sulfate   | 1975 | Bacterial infection                                 | Bacterial 16S ribosome subunit | Y <sup>98</sup>   |
| Tolbutamide          | 1961 | Diabetes mellitus                                   | Sulfonylurea receptor 1        | Y <sup>99</sup>   |
| Topotecan HCl        | 1996 | Ovarian cancer                                      | DNA topoisomerase I            | Y <sup>30</sup>   |
| Tramadol HCl         | 1995 | Pain                                                | Opioid receptor mu             | Y <sup>38</sup>   |
| Valproic Acid        | 1978 | Epilepsy                                            | Histone deacetylase            | Y <sup>1,29</sup> |
| Vancomycin           | 1964 | Infections caused by staphylococci                  | Bacterial cell wall synthesis  | Y <sup>100</sup>  |
| Vandetanib           | 2011 | Unresectable or metastatic medullary thyroid cancer | EGFR; KDR                      | Y <sup>23</sup>   |
| Vinblastine Sulfate  | 1965 | Lymphoma                                            | Tubulin                        | Y <sup>55</sup>   |
| Vincristine Sulfate  | 1963 | Leukemia; Neuroblastoma; Small cell lung cancer     | Tubulin                        | Y <sup>101</sup>  |
| Vinorelbine Tartrate | 1994 | Non-small cell lung cancer                          | Tubulin beta-3 chain           | Y <sup>102</sup>  |
| Voriconazole         | 2002 | Fungal infection                                    | Fungal Cytochrome P450LI       | Y <sup>103</sup>  |
| Warfarin Sodium      | 1954 | Venous thrombosis; Pulmonary embolism               | Vitamin K epoxide reductase    | Y <sup>46</sup>   |

## References:

- 1 E. Dahmane; J. Gobburu; V. Ivaturi. Pharmacometric Approach To Define Narrow Therapeutic Index (NTI) Drugs & Evaluate Bioequivalence (BE) Criteria for NTI Drugs. *Drugs@FDA*. 2018, 1(1): 1-25
- 2 A. Mullard. 2012 FDA drug approvals. *Nat Rev Drug Discov*. 2013, 12(2): 87-90
- 3 S. D. Carstairs; S. R. Williams. Overdose of aripiprazole, a new type of antipsychotic. *J Emerg Med*. 2005, 28(3): 311-3
- 4 T. Spencer; J. Biederman; T. Wilens. Nonstimulant treatment of adult attention-deficit/hyperactivity disorder. *Psychiatr Clin North Am*. 2004, 27(2): 373-83
- 5 A. Mullard. 2011 FDA drug approvals. *Nat Rev Drug Discov*. 2012, 11(2): 91-4

- 6 R. K. Verbeeck; I. Kanfer; R. Lobenberg; B. Abrahamsson; R. Cristofolletti; D. W. Groot; P. Langguth; J. E. Polli; A. Parr; V. P. Shah; M. Mehta; J. B. Dressman. Biowaiver Monographs for Immediate-Release Solid Oral Dosage Forms: Enalapril. *J Pharm Sci.* 2017, 106(8): 1933-43
- 7 K. S. Walia; E. A. Khan; D. H. Ko; S. S. Raza; Y. N. Khan. Side effects of antiepileptics--a review. *Pain Pract.* 2004, 4(3): 194-203
- 8 B. Hughes. 2008 FDA drug approvals. *Nat Rev Drug Discov.* 2009, 8(2): 93-6
- 9 S. Strauch; E. Jantratid; J. B. Dressman; H. E. Junginger; S. Kopp; K. K. Midha; V. P. Shah; S. Stavchansky; D. M. Barends. Biowaiver monographs for immediate release solid oral dosage forms: lamivudine. *J Pharm Sci.* 2011, 100(6): 2054-63
- 10 U. Graefe-Mody; S. Retlich; C. Friedrich. Clinical pharmacokinetics and pharmacodynamics of linagliptin. *Clin Pharmacokinet.* 2012, 51(7): 411-27
- 11 J. W. Eklund; S. Trifilio; M. F. Mulcahy. Chemotherapy dosing in the setting of liver dysfunction. *Oncology.* 2005, 19(8): 1057-63; discussion 63-4, 69
- 12 S. Saletan. Mitoxantrone: an active, new antitumor agent with an improved therapeutic index. *Cancer Treat Rev.* 1987, 14(3-4): 297-303
- 13 B. Knorr; L. M. Franchi; H. Bisgaard; J. H. Vermeulen; P. LeSouef; N. Santanello; T. M. Michele; T. F. Reiss; H. H. Nguyen; D. L. Bratton. Montelukast, a leukotriene receptor antagonist, for the treatment of persistent asthma in children aged 2 to 5 years. *Pediatrics.* 2001, 108(3): E48
- 14 L. F. Eichenfield; L. Beck. Elidel (pimecrolimus) cream 1%: a nonsteroidal topical agent for the treatment of atopic dermatitis. *J Allergy Clin Immunol.* 2003, 111(5): 1153-68
- 15 N. A. Author. Hot drugs 2004. *Nat Rev Drug Discov.* 2004, SupplS3-40
- 16 X. Wang; Z. Y. Zhang; S. Arora; L. Hughes; J. Wang; D. Powers; J. Christensen; S. Lu; V. Kansra. Effects of Rolapitant Administered Intravenously or Orally on the Pharmacokinetics of Digoxin (P-glycoprotein Substrate) and Sulfasalazine (Breast Cancer Resistance Protein Substrate) in Healthy Volunteers. *J Clin Pharmacol.* 2018, 58(2): 202-11
- 17 B. Hughes. 2009 FDA drug approvals. *Nat Rev Drug Discov.* 2010, 9(2): 89-92
- 18 E. Germovsek; C. I. Barker; M. Sharland. What do I need to know about aminoglycoside antibiotics? *Arch Dis Child Educ Pract Ed.* 2017, 102(2): 89-93
- 19 S. N. Ngo; T. Barnes. Is there variability in drug release and physical characteristics of amiodarone chloride from different commercially available tablets? Possible therapeutic implications. *Int J Pharm Pract.* 2010, 18(4): 245-8
- 20 X. W. Chen; E. S. Serag; K. B. Sneed; J. Liang; H. Chew; S. Y. Pan; S. F. Zhou. Clinical herbal interactions with conventional drugs: from molecules to maladies. *Curr Med Chem.* 2011, 18(31): 4836-50
- 21 C. J. Kapelios; G. Karamanakos; S. Liatis; M. Sarafadi; M. Polizois; I. Papoutsis; A. D. Kokkinos. Recurrent episodes of life-threatening vasodilatory shock following unintentional intoxication with amlodipine. *Hellenic J Cardiol.* 2017, 58(5): 369-71

- 22 S. Harmsen; A. C. McLaren; C. Pauken; R. McLemore. Amphotericin B is cytotoxic at locally delivered concentrations. *Clin Orthop Relat Res.* 2011, 469(11): 3016-21
- 23 M. Bretagne; P. Boudou-Rouquette; O. Huillard; A. Thomas-Schoemann; A. Chahwakilian; G. Orvoen; J. Arrondeau; C. Tlemsani; A. Cessot; L. Cabanes; B. Blanchet; R. Coriat; J. Alexandre; F. Goldwasser. [Tyrosine kinase inhibiting the VEGF pathway and elderly people: Tolerance, pre-treatment assessment and side effects management]. *Bull Cancer.* 2016, 103(3): 259-72
- 24 M. A. Buhl; G. Gomez; M. V. Collado; E. M. Oddo; M. Houry; P. J. Azurmendi; J. Sarano. [Genetic polymorphisms of thiopurine methyltransferase and incidence of adverse events in patients with medical indication of azathioprine]. *Medicina.* 2018, 78(2): 65-70
- 25 E. Augier; R. S. Dulman; R. Damadzic; A. Pilling; J. P. Hamilton; M. Heilig. The GABAB Positive Allosteric Modulator ADX71441 Attenuates Alcohol Self-Administration and Relapse to Alcohol Seeking in Rats. *Neuropsychopharmacology.* 2017, 42(9): 1789-99
- 26 Y. S. Lin; S. J. Kerr; T. Randolph; L. M. Shireman; T. Senn; J. S. McCune. Prediction of Intravenous Busulfan Clearance by Endogenous Plasma Biomarkers Using Global Pharmacometabolomics. *Metabolomics.* 2016, 12(10):
- 27 R. Ciftci; F. Tas; S. Karabulut; S. Ciftci. Combination of capecitabine and phenytoin may cause phenytoin intoxication: a case report. *Am J Ther.* 2015, 22(1): e17-9
- 28 P. Chandrasekaran; R. Kandasamy. Development of Extended-Release Oral Flexible Tablet (ER-OFT) Formulation for Pediatric and Geriatric Compliance: an Age-Appropriate Formulation. *AAPS PharmSciTech.* 2017, 18(7): 2394-409
- 29 E. Perucca. Clinical pharmacology and therapeutic use of the new antiepileptic drugs. *Fundam Clin Pharmacol.* 2001, 15(6): 405-17
- 30 A. Rousseau; P. Marquet; J. Debord; C. Sabot; G. Lachatre. Adaptive control methods for the dose individualisation of anticancer agents. *Clin Pharmacokinet.* 2000, 38(4): 315-53
- 31 T. M. Davis; D. A. Syed; K. F. Ilett; P. H. Barrett. Toxicity related to chloroquine treatment of resistant vivax malaria. *Ann Pharmacother.* 2003, 37(4): 526-9
- 32 I. Taskintuna; F. M. Rahhal; J. F. Arevalo; D. Munguia; A. S. Banker; E. De Clercq; W. R. Freeman. Low-dose intravitreal cidofovir (HPMPC) therapy of cytomegalovirus retinitis in patients with acquired immune deficiency syndrome. *Ophthalmology.* 1997, 104(6): 1049-57
- 33 J. Alderman. Coadministration of sertraline with cisapride or pimozide: an open-label, nonrandomized examination of pharmacokinetics and corrected QT intervals in healthy adult volunteers. *Clin Ther.* 2005, 27(7): 1050-63
- 34 J. M. Onoda; K. K. Nelson; J. D. Taylor; K. V. Honn. Cisplatin and nifedipine: synergistic antitumor effects against an inherently cisplatin-resistant tumor. *Cancer Lett.* 1988, 40(1): 39-47
- 35 P. G. Official-Website. Generic Substitution Law and Narrow Therapeutic Index (NTI) drugs. *Pennsylvania Generic Substitution Law.* 2015, 1(1): 1-1

- 36 M. J. Romano; A. Dinh. A 1000-fold overdose of clonidine caused by a compounding error in a 5-year-old child with attention-deficit/hyperactivity disorder. *Pediatrics*. 2001, 108(2): 471-2
- 37 C. Hiemke. Consensus Guideline Based Therapeutic Drug Monitoring (TDM) in Psychiatry and Neurology. *Curr Drug Deliv*. 2016, 13(3): 353-61
- 38 B. R. Overholser; D. R. Foster. Opioid pharmacokinetic drug-drug interactions. *Am J Manag Care*. 2011, 17 Suppl 11S276-87
- 39 Y. Finkelstein; S. E. Aks; J. R. Hutson; D. N. Juurlink; P. Nguyen; G. Dubnov-Raz; U. Pollak; G. Koren; Y. Bentur. Colchicine poisoning: the dark side of an ancient drug. *Clin Toxicol*. 2010, 48(5): 407-14
- 40 S. Medani; C. Wall. Colchicine toxicity in renal patients - Are we paying attention? *Clin Nephrol*. 2016, 86(2): 100-5
- 41 J. M. Pogue; J. K. Ortwine; K. S. Kaye. Clinical considerations for optimal use of the polymyxins: A focus on agent selection and dosing. *Clin Microbiol Infect*. 2017, 23(4): 229-33
- 42 C. Ekhardt; A. Gebretensae; H. Rosing; S. Rodenhuis; J. H. Beijnen; A. D. Huitema. Simultaneous quantification of cyclophosphamide and its active metabolite 4-hydroxycyclophosphamide in human plasma by high-performance liquid chromatography coupled with electrospray ionization tandem mass spectrometry (LC-MS/MS). *J Chromatogr B Analyt Technol Biomed Life Sci*. 2007, 854(1-2): 345-9
- 43 K. A. Rodvold. Clinical pharmacokinetics of clarithromycin. *Clin Pharmacokinet*. 1999, 37(5): 385-98
- 44 D. S. Official-Website. Dalteparin Sodium Drug Summary. *Perscribers' Digital Reference*. 2018, 1(1): 1-1
- 45 E. Gozalpour; R. Greupink; A. Bilos; V. Verweij; J. J. van den Heuvel; R. Masereeuw; F. G. Russel; J. B. Koenderink. Convallatoxin: a new P-glycoprotein substrate. *Eur J Pharmacol*. 2014, 74418-27
- 46 J. D. Henderson; R. H. Esham. Generic substitution: issues for problematic drugs. *South Med J*. 2001, 94(1): 16-21
- 47 R. Valdes, Jr.; S. A. Jortani; M. Gheorghide. Standards of laboratory practice: cardiac drug monitoring. National Academy of Clinical Biochemistry. *Clin Chem*. 1998, 44(5): 1096-109
- 48 K. Eckmann; L. B. Michaud; E. Rivera; T. L. Madden; L. Esparza-Guerra; J. Kawedia; D. J. Booser; M. C. Green; G. N. Hortobagyi; V. Valero. Pilot study to assess toxicity and pharmacokinetics of docetaxel in patients with metastatic breast cancer and impaired liver function secondary to hepatic metastases. *J Oncol Pharm Pract*. 2014, 20(2): 120-9
- 49 Y. L. Han; H. L. Yu; D. Li; X. L. Meng; Z. Y. Zhou; Q. Yu; X. Y. Zhang; F. J. Wang; C. Guo. Inhibitory effects of limonin on six human cytochrome P450 enzymes and P-glycoprotein in vitro. *Toxicol In Vitro*. 2011, 25(8): 1828-33
- 50 P. Naidoo; V. V. Chetty; M. Chetty. Impact of CYP polymorphisms, ethnicity and sex differences in metabolism on dosing strategies: the case of efavirenz. *Eur J Clin Pharmacol*. 2014, 70(4): 379-89

- 51 F. E. Simons. Epinephrine (adrenaline) in the first-aid, out-of-hospital treatment of anaphylaxis. *Novartis Found Symp.* 2004, 257228-43; discussion 43-7, 76-85
- 52 R. J. Cersosimo; W. K. Hong. Epirubicin: a review of the pharmacology, clinical activity, and adverse effects of an adriamycin analogue. *J Clin Oncol.* 1986, 4(3): 425-39
- 53 I. A. Najar; R. K. Johri. Pharmaceutical and pharmacological approaches for bioavailability enhancement of etoposide. *J Biosci.* 2014, 39(1): 139-44
- 54 T. van Gelder; L. Fischer; F. Shihab; M. Shipkova. Optimizing everolimus exposure when combined with calcineurin inhibitors in solid organ transplantation. *Transplant Rev.* 2017, 31(3): 151-57
- 55 D. Padhi; R. Harris. Clinical pharmacokinetic and pharmacodynamic profile of cinacalcet hydrochloride. *Clin Pharmacokinet.* 2009, 48(5): 303-11
- 56 M. W. Saif; R. B. Diasio. Benefit of uridine triacetate (Vistogard) in rescuing severe 5-fluorouracil toxicity in patients with dihydropyrimidine dehydrogenase (DPYD) deficiency. *Cancer Chemother Pharmacol.* 2016, 78(1): 151-6
- 57 J. Fareed; D. A. Hoppensteadt; R. L. Bick. Management of thrombotic and cardiovascular disorders in the new millenium. *Clin Appl Thromb Hemost.* 2003, 9(2): 101-8
- 58 O. K. Thu; O. Spigset; O. G. Nilsen; B. Hellum. Effect of commercial *Rhodiola rosea* on CYP enzyme activity in humans. *Eur J Clin Pharmacol.* 2016, 72(3): 295-300
- 59 C. Thirukkumaran; D. G. Morris. Oncolytic Viral Therapy Using Reovirus. *Methods Mol Biol.* 2015, 1317187-223
- 60 C. Mercier; C. Raynal; L. Dahan; A. Ortiz; A. Evrard; C. Dupuis; A. Blesius; M. Duluc; F. Franceschini; S. Giacometti; S. Salas; G. Milano; R. Favre; J. F. Seitz; J. Ciccolini. Toxic death case in a patient undergoing gemcitabine-based chemotherapy in relation with cytidine deaminase downregulation. *Pharmacogenet Genomics.* 2007, 17(10): 841-4
- 61 K. Brooks. Anticoagulation Drugs: What Nurses Need to Know. *Johns Hopkins Nursing.* 2011, 7(1): 1-1
- 62 J. Ward; N. Lewis; D. A. Tsitsikas. Improving routine outpatient monitoring for patients with sickle-cell disease on hydroxyurea. *BMJ Open Qual.* 2018, 7(1): e000218
- 63 S. H. Preskorn. Inadvertent fatal imipramine poisoning of a child: what happened to Tommy? *J Psychiatr Pract.* 2011, 17(2): 118-23
- 64 N. C. Kaarsholm; S. Lin; L. Yan; T. Kelly; M. van Heek; J. Mu; M. Wu; G. Dai; Y. Cui; Y. Zhu; E. Carballo-Jane; V. Reddy; P. Zafian; P. Huo; S. Shi; V. Antochshuk; A. Ogawa; F. Liu; S. C. Souza; W. Seghezzi; J. L. Duffy; M. Erion; R. P. Nargund; D. E. Kelley. Engineering Glucose Responsiveness Into Insulin. *Diabetes.* 2018, 67(2): 299-308

- 65 S. L. Pogue; T. Taura; M. Bi; Y. Yun; A. Sho; G. Mikesell; C. Behrens; M. Sokolovsky; H. Hallak; M. Rosenstock; E. Sanchez; H. Chen; J. Berenson; A. Doyle; S. Nock; D. S. Wilson. Targeting Attenuated Interferon-alpha to Myeloma Cells with a CD38 Antibody Induces Potent Tumor Regression with Reduced Off-Target Activity. *PLoS One*. 2016, 11(9): e0162472
- 66 K. L. Mealey; S. Dassanayake; N. S. Burke. Establishment of a cell line for assessing drugs as canine P-glycoprotein substrates: proof of principle. *J Vet Pharmacol Ther*. 2017, 40(5): 545-51
- 67 G. E. Schumacher. Using pharmacokinetics in drug therapy. VII: Pharmacokinetic factors influencing drug therapy in the aged. *Am J Hosp Pharm*. 1980, 37(4): 559-62
- 68 C. Gokbulut; H. S. Yalinkilinc; D. Aksit; V. Veneziano. Comparative pharmacokinetics of levamisole-oxyclozanide combination in sheep and goats following per os administration. *Can J Vet Res*. 2014, 78(4): 316-20
- 69 B. M. Parker; B. J. Cusack; R. E. Vestal. Pharmacokinetic optimisation of drug therapy in elderly patients. *Drugs Aging*. 1995, 7(1): 10-8
- 70 K. Nolan; J. Kamrath; J. Levitt. Lindane toxicity: a comprehensive review of the medical literature. *Pediatr Dermatol*. 2012, 29(2): 141-6
- 71 S. Wasserman; G. Meintjes; G. Maartens. Linezolid in the treatment of drug-resistant tuberculosis: the challenge of its narrow therapeutic index. *Expert Rev Anti Infect Ther*. 2016, 14(10): 901-15
- 72 A. J. Kansagra; E. Yang; S. Nambiar; P. S. Patel; M. S. Karetzky. A rare case of acute respiratory distress syndrome secondary to acute lithium intoxication. *Am J Ther*. 2014, 21(2): e31-4
- 73 M. Weiser; S. Burshtein; A. A. Gershon; G. Marian; N. Vlad; I. G. Grecu; E. Tocari; A. Tiugan; M. Hotineanu; J. M. Davis. Allopurinol for mania: a randomized trial of allopurinol versus placebo as add-on treatment to mood stabilizers and/or antipsychotic agents in manic patients with bipolar disorder. *Bipolar Disord*. 2014, 16(4): 441-7
- 74 S. Sahasranaman; D. Howard; S. Roy. Clinical pharmacology and pharmacogenetics of thiopurines. *Eur J Clin Pharmacol*. 2008, 64(8): 753-67
- 75 S. Ouwerkerk-Mahadevan; J. Snoeys; M. Peeters; M. Beumont-Mauviel; A. Simion. Drug-Drug Interactions with the NS3/4A Protease Inhibitor Simeprevir. *Clin Pharmacokinet*. 2016, 55(2): 197-208
- 76 I. Meineke; H. Steinmetz; J. Kirchheiner; J. Brockmoller. Therapeutic drug monitoring of mirtazapine, desmethylmirtazapine, 8-hydroxymirtazapine, and mirtazapine-N-oxide by enantioselective HPLC with fluorescence detection. *Ther Drug Monit*. 2006, 28(6): 760-5
- 77 I. A. Shah; W. E. Lindup; P. G. McCulloch. Variability of mitomycin C adsorption by activated charcoal. *J Pharm Pharmacol*. 1998, 50(3): 251-6
- 78 D. Theile; W. E. Haefeli; J. Weiss. Effects of adrenolytic mitotane on drug elimination pathways assessed in vitro. *Endocrine*. 2015, 49(3): 842-53

- 79 L. M. Shaw; D. W. Holt; P. Keown; R. Venkataramanan; R. W. Yatscoff. Current opinions on therapeutic drug monitoring of immunosuppressive drugs. *Clin Ther.* 1999, 21(10): 1632-52; discussion 31
- 80 C. Mendelsohn. Managing nicotine dependence in NSW hospitals under the Smoke-free Health Care Policy. *Public Health Res Pract.* 2015, 25(3): e2531533
- 81 P. Gjerden; L. Slordal. [Clinical pharmacology of anticholinergic antiparkinson agents. A review with emphasis on acute toxicity]. *Tidsskr Nor Laegeforen.* 1998, 118(1): 53-5
- 82 S. J. Hwang; J. W. Park; S. D. Lee; G. J. Kim; C. H. Sin; S. H. Nam; B. S. Kim. Capecitabine and oxaliplatin (XELOX) for the treatment of patients with metastatic gastric cancer and severe liver dysfunction. *Korean J Intern Med.* 2006, 21(4): 252-5
- 83 C. A. Grotegut; E. Ngan; M. E. Garrett; M. L. Miranda; A. E. Ashley-Koch; G. K. Swamy. The association of single-nucleotide polymorphisms in the oxytocin receptor and G protein-coupled receptor kinase 6 (GRK6) genes with oxytocin dosing requirements and labor outcomes. *Am J Obstet Gynecol.* 2017, 217(3): 367 e1-67 e9
- 84 S. Minhas; N. Setia; S. Pandita; R. Saxena; I. C. Verma; S. Aggarwal. Prevalence of CYP2C8 polymorphisms in a North Indian population. *Genet Mol Res.* 2013, 12(3): 2260-6
- 85 M. M. Posada; J. A. Bacon; K. B. Schneck; R. G. Tirona; R. B. Kim; J. W. Higgins; Y. A. Pak; S. D. Hall; K. M. Hillgren. Prediction of renal transporter mediated drug-drug interactions for pemetrexed using physiologically based pharmacokinetic modeling. *Drug Metab Dispos.* 2015, 43(3): 325-34
- 86 S. M. Coupey. Barbiturates. *Pediatr Rev.* 1997, 18(8): 260-4; quiz 65
- 87 M. H. Umer Usman; S. Raza; S. Raza; M. Ezekowitz. Advancement in antithrombotics for stroke prevention in atrial fibrillation. *J Interv Card Electrophysiol.* 2008, 22(2): 129-37
- 88 S. Barbour; T. Smit; X. Wang; D. Powers; S. Arora; V. Kansra; M. Aapro; J. Herrstedt. Integrated safety analysis of rolapitant with coadministered drugs from phase II/III trials: an assessment of CYP2D6 or BCRP inhibition by rolapitant. *Ann Oncol.* 2017, 28(6): 1268-73
- 89 M. A. Kuhn. Herbal remedies: drug-herb interactions. *Crit Care Nurse.* 2002, 22(2): 22-8, 30, 32; quiz 34-5
- 90 A. Dhir. Propofol in the treatment of refractory migraine headaches. *Expert Rev Neurother.* 2016, 16(9): 1007-11
- 91 C. Becker; J. B. Dressman; G. L. Amidon; H. E. Junginger; S. Kopp; K. K. Midha; V. P. Shah; S. Stavchansky; D. M. Barends. Biowaiver monographs for immediate release solid oral dosage forms: pyrazinamide. *J Pharm Sci.* 2008, 97(9): 3709-20
- 92 D. Soltanifar; B. Carvalho; P. Sultan. Perioperative considerations of the patient with malaria. *Can J Anaesth.* 2015, 62(3): 304-18
- 93 N. Goodarzi; A. Barazesh Morgani; B. Abrahamsson; R. Cristofolletti; D. W. Groot; P. Langguth; M. U. Mehta; J. E. Polli; V. P. Shah; J. B. Dressman. Biowaiver Monographs for Immediate Release Solid Oral Dosage Forms: Ribavirin. *J Pharm Sci.* 2016, 105(4): 1362-9

- 94 B. Golubovic; M. Prostran; B. Miljkovic; K. Vucicevic; D. Radivojevic; I. Grabnar. Population Pharmacokinetic Approach of Immunosuppressive Therapy in Kidney Transplant Patients. *Curr Med Chem*. 2016, 23(19): 1998-2011
- 95 R. M. Velickovic-Radovanovic; G. Paunovic; M. Mikov; V. Djordjevic; M. Stojanovic; A. Catic-Djordjevic; T. Cvetkovic. Clinical pharmacokinetics of tacrolimus after the first oral administration in renal transplant recipients on triple immunosuppressive therapy. *Basic Clin Pharmacol Toxicol*. 2010, 106(6): 505-10
- 96 J. A. Ohar; J. F. Donohue. Mono- and combination therapy of long-acting bronchodilators and inhaled corticosteroids in advanced COPD. *Semin Respir Crit Care Med*. 2010, 31(3): 321-33
- 97 H. R. Henney, 3rd; A. Fitzpatrick; J. Stewart; J. D. Runyan. Relative bioavailability of tizanidine hydrochloride capsule formulation compared with capsule contents administered in applesauce: a single-dose, open-label, randomized, two-way, crossover study in fasted healthy adult subjects. *Clin Ther*. 2008, 30(12): 2263-71
- 98 V. Madsen; A. Lind; M. Rasmussen; K. Coulthard. Determination of tobramycin in saliva is not suitable for therapeutic drug monitoring of patients with cystic fibrosis. *J Cyst Fibros*. 2004, 3(4): 249-51
- 99 J. O. Miners; D. J. Birkett. Cytochrome P4502C9: an enzyme of major importance in human drug metabolism. *Br J Clin Pharmacol*. 1998, 45(6): 525-38
- 100 C. S. Bouman; H. J. van Kan; R. P. Koopmans; J. C. Korevaar; M. J. Schultz; M. B. Vroom. Discrepancies between observed and predicted continuous venovenous hemofiltration removal of antimicrobial agents in critically ill patients and the effects on dosing. *Intensive Care Med*. 2006, 32(12): 2013-9
- 101 R. Said; A. M. Tsimberidou. Pharmacokinetic evaluation of vincristine for the treatment of lymphoid malignancies. *Expert Opin Drug Metab Toxicol*. 2014, 10(3): 483-94
- 102 N. K. Ibrahim; V. Valero; Z. Rahman; R. L. Theriault; R. S. Walters; A. U. Buzdar; D. J. Booser; F. A. Holmes; J. L. Murray, 3rd; J. Willey; R. Bast; G. N. Hortobagyi. Phase I-II vinorelbine (Navelbine) by continuous infusion in patients with metastatic breast cancer: cumulative toxicities limit dose escalation. *Cancer Invest*. 2001, 19(5): 459-66
- 103 R. S. Kadam; J. N. Van Den Anker. Pediatric Clinical Pharmacology of Voriconazole: Role of Pharmacokinetic/Pharmacodynamic Modeling in Pharmacotherapy. *Clin Pharmacokinet*. 2016, 55(9): 1031-43
